# Supplementary material for: Development of a urinometer for automatic measurement of urine flow in catheterized patients
Source: PubMed Central journal article supplement (PMC10470914; doi:10.1371/journal.pone.0290319), 2023-08-31
Supplement: pone.0290319.s007.pdf [file pone.0290319.s007.pdf]

# Urinometer Bill of Materials

| Description                                             | Quantity     | Price (€)    |
|---------------------------------------------------------|--------------|--------------|
| Min PCB Model Heltec Wifi Lora 32 (V2.1)                | 1            | 18,00        |
| Main board for urinometer (PCB)                         | 1            | 3,80         |
| PCB up ring                                             | 1            | 0,60         |
| PCB down ring for sensor                                | 1            | 0,60         |
| LED IR QEE113                                           | 1            | 1,00         |
| Phottransistor QSE113                                   | 1            | 0,80         |
| RJ45 connector for lic ports                            | 2            | 1,00         |
| MicroSD Module                                          | 1            | 2,00         |
| RTC Module with DS3231 and CR2032 battery               | 1            | 3,29         |
| Color sensor Module TCS34725                            | 1            | 3,67         |
| MicroSD card 8Gb                                        | 1            | 2,68         |
| Power Bank battery 5000 mA/h                            | 1            | 15,00        |
| Miscellaneous (wires, adaptors, connectors headers,...) | 1            | 7,56         |
|                                                         | <b>TOTAL</b> | <b>60,00</b> |
