# Supplementary material for: Development of a urinometer for automatic measurement of urine flow in catheterized patients
Source: PubMed Central journal article supplement (PMC10470914; doi:10.1371/journal.pone.0290319), 2023-08-31
Supplement: pone.0290319.s008.pdf [file pone.0290319.s008.pdf]

# Density Compared

| Liquid and density (g/ml) | Volume | Measured value | % error |
|---------------------------|--------|----------------|---------|
| Nrmal saline 0,9% = 1,005 | 100    | 89,95          | 10,05   |
| 1,005 < WATER < 1,025     | 100    | 91,50          | 8,50    |
| SEAWATER => 1,0025        | 100    | 92,1           | 7,90    |

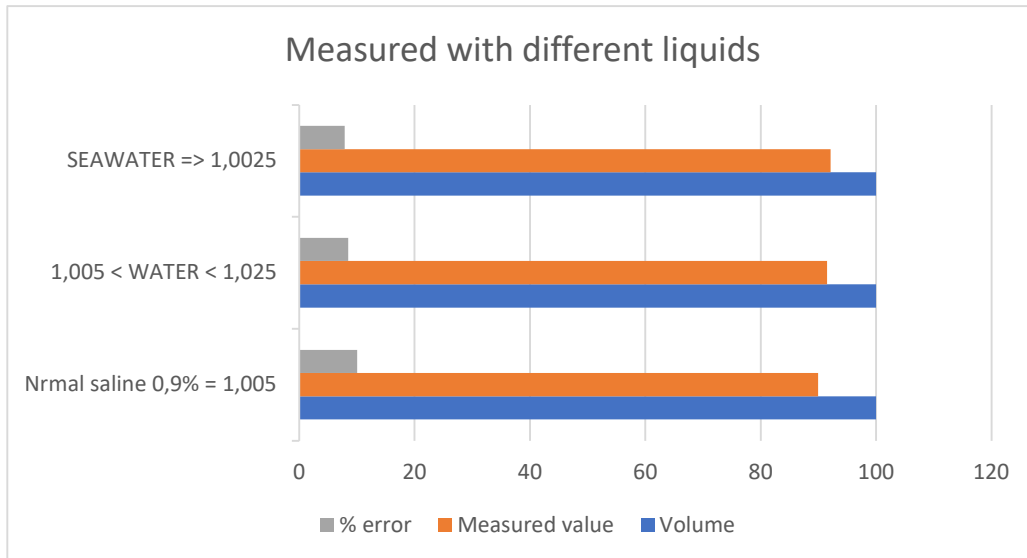

| Perfusion pump |             | LIQUID   |         |                                | WATER   |
|----------------|-------------|----------|---------|--------------------------------|---------|
| Flow ml/h      | Volume (ml) | Measured | error % | Measurement + systematic error | error % |
| 10             | 5           | 4,7      | 6,00    | 5,24                           | 4,80    |
| 10             | 5           | 4,6      | 8,00    | 5,14                           | 2,80    |
| 10             | 5           | 4,8      | 4,00    | 5,34                           | 6,80    |
| 10             | 5           | 4,7      | 6,00    | 5,24                           | 4,80    |
| 10             | 5           | 4,7      | 6,00    | 5,24                           | 4,80    |
| 10             | 5           | 4,85     | 3,00    | 5,39                           | 7,80    |
| 10             | 5           | 4,75     | 5,00    | 5,29                           | 5,80    |
| 50             | 400         | 363,25   | 9,19    | 406,45                         | 1,61    |
| 50             | 400         | 364,5    | 8,88    | 407,70                         | 1,93    |
| 50             | 400         | 362,8    | 9,30    | 406,00                         | 1,50    |
| 50             | 400         | 362,75   | 9,31    | 405,95                         | 1,49    |
| 50             | 400         | 363,5    | 9,13    | 406,70                         | 1,68    |
| 50             | 400         | 363,25   | 9,19    | 406,45                         | 1,61    |
| 60             | 284,12      | 260,75   | 8,23    | 291,43                         | 2,57    |
| 60             | 284,12      | 259      | 8,84    | 289,68                         | 1,96    |
| 60             | 284,12      | 262,75   | 7,52    | 293,43                         | 3,28    |
| 60             | 284,12      | 261,25   | 8,05    | 291,93                         | 2,75    |
| 60             | 284,12      | 260,25   | 8,40    | 290,93                         | 2,40    |
| 60             | 284,12      | 261,25   | 8,05    | 291,93                         | 2,75    |

| Perfusion pump |             | LIQUID   |         |                                | WATER   |
|----------------|-------------|----------|---------|--------------------------------|---------|
| Flow ml/h      | Volume (ml) | Measured | error % | Measurement + systematic error | error % |
| 70             | 5           | 4,55     | 9,00    | 5,09                           | 1,80    |
| 70             | 5           | 4,4      | 12,00   | 4,94                           | 1,20    |
| 70             | 5           | 4,45     | 11,00   | 4,99                           | 0,20    |
| 70             | 5           | 4,55     | 9,00    | 5,09                           | 1,80    |
| 70             | 5           | 4,3      | 14,00   | 4,84                           | 3,20    |
| 70             | 5           | 4,55     | 9,00    | 5,09                           | 1,80    |
| 70             | 5           | 4,45     | 11,00   | 4,99                           | 0,20    |
| 70             | 10          | 8,9      | 11,00   | 9,98                           | 0,20    |
| 70             | 10          | 9,1      | 9,00    | 10,18                          | 1,80    |
| 70             | 10          | 9,05     | 9,50    | 10,13                          | 1,30    |
| 70             | 10          | 9,1      | 9,00    | 10,18                          | 1,80    |
| 70             | 10          | 9,05     | 9,50    | 10,13                          | 1,30    |
| 70             | 25          | 20,55    | 17,80   | 23,25                          | 7,00    |
| 70             | 25          | 20,65    | 17,40   | 23,35                          | 6,60    |
| 70             | 30          | 26,8     | 10,67   | 30,04                          | 0,13    |
| 70             | 30          | 26,55    | 11,50   | 29,79                          | 0,70    |
| 70             | 50          | 48,25    | 3,50    | 53,65                          | 7,30    |
| 70             | 50          | 45,45    | 9,10    | 50,85                          | 1,70    |
| 70             | 50          | 48,40    | 3,20    | 53,80                          | 7,60    |
| 70             | 50          | 44,5     | 11,00   | 49,90                          | 0,20    |
| 70             | 70          | 62,6     | 10,57   | 70,16                          | 0,23    |

| Perfusion pump |             | LIQUID   |         |                                | WATER   |
|----------------|-------------|----------|---------|--------------------------------|---------|
| Flow ml/h      | Volume (ml) | Measured | error % | Measurement + systematic error | error % |
| 70             | 100         | 84,7     | 15,30   | 95,50                          | 4,50    |
| 70             | 100         | 90,2     | 9,80    | 101,00                         | 1,00    |
| 70             | 100         | 90,25    | 9,75    | 101,05                         | 1,05    |
| 70             | 100         | 89,50    | 10,50   | 100,30                         | 0,30    |
| 70             | 100         | 88,75    | 11,25   | 99,55                          | 0,45    |
| 70             | 100         | 89,75    | 10,25   | 100,55                         | 0,55    |
| 70             | 100         | 90,50    | 9,50    | 101,30                         | 1,30    |
| 70             | 100         | 92,50    | 7,50    | 103,30                         | 3,30    |
| 70             | 100         | 94,25    | 5,75    | 105,05                         | 5,05    |
| 70             | 100         | 95,60    | 4,40    | 106,40                         | 6,40    |
| 70             | 100         | 95,90    | 4,10    | 106,70                         | 6,70    |
| 70             | 100         | 91,50    | 8,50    | 102,30                         | 2,30    |
| 70             | 100         | 94,10    | 5,90    | 104,90                         | 4,90    |
| 70             | 100         | 93,45    | 6,55    | 104,25                         | 4,25    |
| 70             | 100         | 91,75    | 8,25    | 102,55                         | 2,55    |
| 70             | 100         | 92,05    | 7,95    | 102,85                         | 2,85    |
| 70             | 100         | 92,10    | 7,90    | 102,90                         | 2,90    |
| 70             | 100         | 92,95    | 7,05    | 103,75                         | 3,75    |
| 70             | 100         | 95,95    | 4,05    | 106,75                         | 6,75    |
| 70             | 100         | 92,30    | 7,70    | 103,10                         | 3,10    |
| 70             | 100         | 96,00    | 4,00    | 106,80                         | 6,80    |

| Perfusion pump |             | LIQUID   |         |                                | WATER   |
|----------------|-------------|----------|---------|--------------------------------|---------|
| Flow ml/h      | Volume (ml) | Measured | error % | Measurement + systematic error | error % |
| 100            | 5           | 4,5      | 10,00   | 5,04                           | 0,80    |
| 100            | 5           | 4,45     | 11,00   | 4,99                           | 0,20    |
| 100            | 5           | 4,5      | 10,00   | 5,04                           | 0,80    |
| 100            | 5           | 4,7      | 6,00    | 5,24                           | 4,80    |
| 100            | 100         | 91       | 9,00    | 101,80                         | 1,80    |
| 100            | 100         | 91,4     | 8,60    | 102,20                         | 2,20    |
| 100            | 100         | 88,85    | 11,15   | 99,65                          | 0,35    |
| 100            | 100         | 85,4     | 14,60   | 96,20                          | 3,80    |
| 100            | 100         | 79,05    | 20,95   | 89,85                          | 10,15   |
| 100            | 100         | 85,7     | 14,30   | 96,50                          | 3,50    |
| 100            | 100         | 79,55    | 20,45   | 90,35                          | 9,65    |
| 100            | 100         | 78,25    | 21,75   | 89,05                          | 10,95   |
| 100            | 100         | 90,3     | 9,70    | 101,10                         | 1,10    |
| 100            | 100         | 90,55    | 9,45    | 101,35                         | 1,35    |
| 150            | 50          | 41,05    | 17,90   | 46,45                          | 7,10    |
| 150            | 50          | 41,5     | 17,00   | 46,90                          | 6,20    |
| 150            | 50          | 41,75    | 16,50   | 47,15                          | 5,70    |
| 150            | 50          | 40,95    | 18,10   | 46,35                          | 7,30    |
| 150            | 50          | 41       | 18,00   | 46,40                          | 7,20    |
| 150            | 50          | 41,05    | 17,90   | 46,45                          | 7,10    |
| 150            | 50          | 41,75    | 16,50   | 47,15                          | 5,70    |

| Perfusion pump |             | LIQUID   |         |                                   | WATER   |
|----------------|-------------|----------|---------|-----------------------------------|---------|
| Flow ml/h      | Volume (ml) | Measured | error % | Measurement +<br>systematic error | error % |
| 200            | 50          | 41,05    | 17,90   | 46,45                             | 7,10    |
| 200            | 100         | 90,15    | 9,85    | 100,95                            | 0,95    |
| 200            | 100         | 83,75    | 16,25   | 94,55                             | 5,45    |
| 200            | 100         | 82,5     | 17,50   | 93,30                             | 6,70    |
| 200            | 100         | 82,75    | 17,25   | 93,55                             | 6,45    |
| 200            | 100         | 81,95    | 18,05   | 92,75                             | 7,25    |
| 200            | 100         | 83,25    | 16,75   | 94,05                             | 5,95    |
| 200            | 100         | 83,5     | 16,50   | 94,30                             | 5,70    |
| 200            | 100         | 83,9     | 16,10   | 94,70                             | 5,30    |
| 200            | 200         | 162,6    | 18,70   | 184,20                            | 7,90    |
| 300            | 100         | 79,55    | 20,45   | 90,35                             | 9,65    |
| 300            | 100         | 80,05    | 19,95   | 90,85                             | 9,15    |
| 500            | 16          | 12       | 25,00   | 13,73                             | 14,20   |
| 500            | 16          | 11,85    | 25,94   | 13,58                             | 15,14   |
| 500            | 16          | 12,2     | 23,75   | 13,93                             | 12,95   |
| 500            | 100         | 77,2     | 22,80   | 88,00                             | 12,00   |
| 500            | 100         | 76,95    | 23,05   | 87,75                             | 12,25   |
| 500            | 100         | 76,8     | 23,20   | 87,60                             | 12,40   |
| 500            | 100         | 76,75    | 23,25   | 87,55                             | 12,45   |

| Perfusion pump |             | LIQUID   |         |                                   | Serum 0,9% |
|----------------|-------------|----------|---------|-----------------------------------|------------|
| Flow ml/h      | Volume (ml) | Measured | error % | Measurement +<br>systematic error | error %    |
| 100            | 100         | 89,9     | 10,10   | 100,70                            | 0,70       |
| 100            | 100         | 89,8     | 10,20   | 100,60                            | 0,60       |
| 100            | 100         | 89,9     | 10,10   | 100,70                            | 0,70       |
| 100            | 100         | 89,25    | 10,75   | 100,05                            | 0,05       |
| 100            | 100         | 89,25    | 10,75   | 100,05                            | 0,05       |
| 100            | 100         | 89,95    | 10,05   | 100,75                            | 0,75       |
| 100            | 100         | 89,85    | 10,15   | 100,65                            | 0,65       |
| 100            | 100         | 89,25    | 10,75   | 100,05                            | 0,05       |
| 100            | 100         | 89,2     | 10,80   | 100,00                            | 0,00       |
| 100            | 100         | 89,85    | 10,15   | 100,65                            | 0,65       |
| 100            | 100         | 89,8     | 10,20   | 100,60                            | 0,60       |
| 100            | 100         | 89,95    | 10,05   | 100,75                            | 0,75       |
| 100            | 100         | 89,25    | 10,75   | 100,05                            | 0,05       |
| 100            | 100         | 89,85    | 10,15   | 100,65                            | 0,65       |
| 100            | 100         | 89,9     | 10,10   | 100,70                            | 0,70       |
| 100            | 100         | 89,85    | 10,15   | 100,65                            | 0,65       |
| 100            | 100         | 89,8     | 10,20   | 100,60                            | 0,60       |
| 100            | 100         | 89,25    | 10,75   | 100,05                            | 0,05       |
| 100            | 100         | 89,9     | 10,10   | 100,70                            | 0,70       |
| 100            | 100         | 89,85    | 10,15   | 100,65                            | 0,65       |

| Perfusion pump |             | LIQUID   |         |                                   | Serum 0,9% |
|----------------|-------------|----------|---------|-----------------------------------|------------|
| Flow ml/h      | Volume (ml) | Measured | error % | Measurement +<br>systematic error | error %    |
| 100            | 100         | 89,25    | 10,75   | 100,05                            | 0,05       |
| 100            | 100         | 89,95    | 10,05   | 100,75                            | 0,75       |
| 100            | 100         | 89,9     | 10,10   | 100,70                            | 0,70       |
| 100            | 100         | 89,85    | 10,15   | 100,65                            | 0,65       |
| 100            | 100         | 89,8     | 10,20   | 100,60                            | 0,60       |
| 100            | 100         | 89,85    | 10,15   | 100,65                            | 0,65       |
| 100            | 100         | 89,95    | 10,05   | 100,75                            | 0,75       |
| 100            | 100         | 89,85    | 10,15   | 100,65                            | 0,65       |
| 100            | 100         | 89,8     | 10,20   | 100,60                            | 0,60       |
| 100            | 100         | 89,85    | 10,15   | 100,65                            | 0,65       |
| 100            | 100         | 89,85    | 10,15   | 100,65                            | 0,65       |
| 100            | 100         | 89,9     | 10,10   | 100,70                            | 0,70       |
| 100            | 100         | 89,25    | 10,75   | 100,05                            | 0,05       |
| 100            | 100         | 89,95    | 10,05   | 100,75                            | 0,75       |
| 100            | 100         | 89,25    | 10,75   | 100,05                            | 0,05       |
| 100            | 100         | 89,85    | 10,15   | 100,65                            | 0,65       |
| 100            | 100         | 89,9     | 10,10   | 100,70                            | 0,70       |
| 100            | 100         | 89,8     | 10,20   | 100,60                            | 0,60       |
| 100            | 100         | 89,85    | 10,15   | 100,65                            | 0,65       |
| 100            | 100         | 89,9     | 10,10   | 100,70                            | 0,70       |

| Perfusion pump |             | LIQUID   |         |                                   |         | Serum 0,9% |
|----------------|-------------|----------|---------|-----------------------------------|---------|------------|
| Flow ml/h      | Volume (ml) | Measured | error % | Measurement +<br>systematic error | error % |            |
| 200            | 100         | 80,65    | 19,35   | 91,45                             | 8,55    |            |
| 200            | 100         | 80,3     | 19,7    | 91,10                             | 8,90    |            |
| 200            | 100         | 80,45    | 19,55   | 91,25                             | 8,75    |            |
| 200            | 100         | 80,35    | 19,65   | 91,15                             | 8,85    |            |
| 200            | 100         | 80,55    | 19,45   | 91,35                             | 8,65    |            |
| 200            | 100         | 80,3     | 19,7    | 91,10                             | 8,90    |            |
| 200            | 100         | 80,4     | 19,6    | 91,20                             | 8,80    |            |
| 200            | 100         | 80,55    | 19,45   | 91,35                             | 8,65    |            |
| 200            | 100         | 80,6     | 19,4    | 91,40                             | 8,60    |            |
| 300            | 100         | 79,85    | 20,15   | 90,65                             | 9,35    |            |
| 300            | 100         | 79,9     | 20,10   | 90,70                             | 9,30    |            |
| 300            | 100         | 79,85    | 20,15   | 90,65                             | 9,35    |            |
| 300            | 100         | 80,15    | 19,85   | 90,95                             | 9,05    |            |
| 350            | 100         | 78,95    | 21,05   | 89,75                             | 10,25   |            |
| 400            | 100         | 78,1     | 21,90   | 88,90                             | 11,10   |            |
| 400            | 100         | 77,6     | 22,40   | 88,40                             | 11,60   |            |
| 500            | 100         | 79,2     | 20,80   | 90,00                             | 10,00   |            |
| 500            | 100         | 79       | 21,00   | 89,80                             | 10,20   |            |
| 500            | 100         | 79,15    | 20,85   | 89,95                             | 10,05   |            |
| 500            | 100         | 78,95    | 21,05   | 89,75                             | 10,25   |            |

| Perfusion pump |             |          | LIQUID  | AGUA                              | Sea water |
|----------------|-------------|----------|---------|-----------------------------------|-----------|
| Flow ml/h      | Volume (ml) | Measured | error % | Measurement +<br>systematic error | error %   |
| 100            | 100         | 90,85    | 9,15    | 101,65                            | 1,65      |
| 100            | 100         | 90,95    | 9,05    | 101,75                            | 1,75      |
| 100            | 100         | 89,9     | 10,10   | 100,70                            | 0,70      |
| 100            | 100         | 91,95    | 8,05    | 102,75                            | 2,75      |
| 100            | 100         | 90,85    | 9,15    | 101,65                            | 1,65      |
| 100            | 100         | 91,95    | 8,05    | 102,75                            | 2,75      |
| 100            | 100         | 90,95    | 9,05    | 101,75                            | 1,75      |
| 100            | 100         | 89,25    | 10,75   | 100,05                            | 0,05      |
| 100            | 100         | 91,95    | 8,05    | 102,75                            | 2,75      |
| 100            | 100         | 90,85    | 9,15    | 101,65                            | 1,65      |
| 100            | 100         | 89,8     | 10,20   | 100,60                            | 0,60      |
| 100            | 100         | 90,95    | 9,05    | 101,75                            | 1,75      |
| 100            | 100         | 89,25    | 10,75   | 100,05                            | 0,05      |
| 100            | 100         | 90,85    | 9,15    | 101,65                            | 1,65      |
| 100            | 100         | 90,85    | 9,15    | 101,65                            | 1,65      |
| 100            | 100         | 89,85    | 10,15   | 100,65                            | 0,65      |
| 100            | 100         | 91,95    | 8,05    | 102,75                            | 2,75      |
| 100            | 100         | 89,25    | 10,75   | 100,05                            | 0,05      |
| 100            | 100         | 91,95    | 8,05    | 102,75                            | 2,75      |
| 100            | 100         | 90,85    | 9,15    | 101,65                            | 1,65      |

| Nº | COLOR | SAMPLE COLOR      | R   | G   | B   | CLEAR | TEMP  | LUX   |
|----|-------|-------------------|-----|-----|-----|-------|-------|-------|
| 1  |       | NO TUBE           | 185 | 255 | 255 | 65535 | 11176 | 40026 |
| 2  |       | EMPTY TUBE        | 124 | 117 | 86  | 65535 | 4127  | 21380 |
| 3  |       | TUBE WITH WATER   | 128 | 146 | 110 | 65535 | 5065  | 27962 |
| 4  |       | LIGHT YELLOW      | 99  | 113 | 65  | 48694 | 3867  | 18802 |
| 5  |       | STRAW YELLOW      | 113 | 89  | 67  | 45008 | 3454  | 9559  |
| 6  |       | GREENISH-YELLOW   | 94  | 105 | 69  | 49674 | 4268  | 16571 |
| 7  |       | YELLOW VERY CLEAR | 101 | 99  | 75  | 40541 | 4519  | 10995 |
| 8  |       | CLEAR YELLOW      | 105 | 92  | 70  | 49977 | 4008  | 11808 |
| 9  |       | ORANGE/YELLOW     | 135 | 90  | 39  | 49092 | 2129  | 13402 |
| 10 |       | ORANGEGOLD        | 154 | 77  | 54  | 32191 | 1654  | 4309  |
| 11 |       | PINK              | 183 | 55  | 54  | 19435 | 6908  | 64587 |
| 12 |       | RED/ORANGE        | 160 | 69  | 70  | 26746 | 3933  | 806   |
| 13 |       | RED WINE          | 164 | 68  | 70  | 25584 | 5647  | 367   |
| 14 |       | RED WINE          | 129 | 83  | 77  | 18253 | 3638  | 2770  |
| 15 |       | DARK RED          | 134 | 95  | 92  | 15874 | 4669  | 2503  |
| 16 |       | LIGHT GREEN       | 90  | 105 | 85  | 32389 | 5704  | 9541  |
